# Supplementary material for: PRMT1 inhibition perturbs RNA metabolism and induces DNA damage in clear cell renal cell carcinoma
Source: PubMed Central journal article supplement — Nat Commun. 2024 Sep 19;15:8232. doi: 10.1038/s41467-024-52507-y (PMC11413393; doi:10.1038/s41467-024-52507-y), 2024-09-19
Supplement: 41467_2024_52507_MOESM1_ESM.pdf [file 41467_2024_52507_MOESM1_ESM.pdf]

**Supplementary Table 1 - Epiprobe chemicals**

| <b>Protein Family</b> | <b>Target</b>   | <b>Probe</b> | <b>PubMed ID</b> |
|-----------------------|-----------------|--------------|------------------|
| Methyltransferase     | SUV20H1/H2      | A-196        | 28114273         |
| Methyltransferase     | EHMT2, EHMT1    | A-366        | 24900801         |
| Methyltransferase     | SMYD2           | BAY-598      | 27075367         |
| Bromodomain           | BAZ2A/2B        | BAZ2-ICR     | 25719566         |
| Bromodomain           | BRD9, BRD7      | BI-9564      | 26914985         |
| Bromodomain           | BAZ2A/2B        | GSK2801      | 25799074         |
| Methyltransferase     | EZH2            | GSK343       | 24900432         |
| PAD                   | PAD-4           | GSK484       | 25622091         |
| Methyltransferase     | PRMT5           | GSK591       | 26985292         |
| KDM                   | KDM6B, KDM6A    | GSKJ4        | 22842901         |
| KDM                   | KDM1A           | GSKLSD1      | 26175415         |
| Bromodomain           | BRD9            | I-BRD9       | 25856009         |
| Bromodomain           | CREBBP P300     | I-CBP112     | 26552700         |
| PHD                   | pan-2-OG        | IOX1         | 24504543         |
| Bromodomain           | BRD2-4          | JQ-1         | 20871596         |
| Bromodomain           | BRD9, BRD7      | LP99         | 25864491         |
| Methyltransferase     | Type I PRMT     | MS023        | 26598975         |
| Methyltransferase     | PRMT4, PRMT6    | MS049        | 27584694         |
| Bromodomain           | BRPF1-3         | NI-57        | 28714688         |
| Bromodomain           | BRPF1-3         | OF-1         | 21804994         |
| Bromodomain           | BRD2-4          | PFI-1        | 23095041         |
| Methyltransferase     | SETD7           | PFI-2        | 25136132         |
| Bromodomain           | SMARCA2,4       | PFI-3        | 26139243         |
| Bromodomain           | BRPF1B          | PFI-4        | 28849908         |
| Methyltransferase     | DOT1L           | SGC0946      | 23250418         |
| Methyltransferase     | PRMT3           | SGC707       | 25728001         |
| Bromodomain           | CREBBP P300     | SGC-CBP30    | 24946055         |
| Methyltransferase     | EHMT2, EHMT1    | UNC0638      | 21743462         |
| Kme                   | L3MBTL3         | UNC1215      | 23292653         |
| Methyltransferase     | EZH2            | UNC1999      | 23614352         |
| Bromodomain           | Pan-Bromodomain | Bromosporine | 27757418         |
| Bromodomain           | CECR2           | NVS-CECR2-1  | -                |
| HDAC                  | HDAC            | LAQ824       | 12816865         |
| HDAC                  | HDAC            | CI-994       | 17455259         |
| Methyltransferase     | EHMT2, EHMT1    | UNC0642      | 24102134         |
| WD40 repeats          | WD40 (WDR5)     | OICR-9429    | 26167872         |

Supplementary Table 2 - sgRNA's

| sgRNA name             | sgRNA Target Sequence | PAM Sequence | Target Transcript     | Exon Number<br>(Relative to<br>transcript) | Strand    | On-Target Efficacy<br>Score<br>(Azimuth 2.0) | Position of Base<br>After Cut (1-based) |
|------------------------|-----------------------|--------------|-----------------------|--------------------------------------------|-----------|----------------------------------------------|-----------------------------------------|
| PRMT1_e4               | AAAGCCAACAAGTTAGACCA  | CGG          | NM_198318.4 (PRMT1v1) | 4                                          | sense     | 0.7305                                       | 49682255                                |
| PRMT1_e6               | GATGGCCGTCACATACAGCG  | TGG          | NM_198318.4 (PRMT1v1) | 6                                          | antisense | 0.7528                                       | 49684791                                |
| PRMT1_e7               | GGGTCCACGACATCCACTAG  | GGG          | NM_198318.4 (PRMT1v1) | 7                                          | antisense | 0.7112                                       | 49684987                                |
| PRMT1_e2               | GTGGATGCCAAAGTGTGCGT  | AGG          | NM_198318.4 (PRMT1v1) | 2                                          | antisense | 0.6442                                       | 49680569                                |
| PRMT3e8                | CCAACATCCAAAACCTACCTA | GGG          | NM_001145167.1        | 8                                          | antisense | 0.6114                                       | 20407911                                |
| PRMT3e4                | GAATTCATGTAAGTCACTGT  | AGG          | NM_001145167.1        | 4                                          | antisense | 0.5647                                       | 20392906                                |
| PRMT3e6                | GTCATCTACTAGTGCATTG   | CGG          | NM_001145167.1        | 6                                          | sense     | 0.6283                                       | 20397642                                |
| PRMT3e9                | TAGATGTTATCATATCTGAG  | TGG          | NM_001145167.1        | 9                                          | sense     | 0.7266                                       | 20426857                                |
| PRMT6e1.1              | CGTTCGCGCTTAGTCCCTCCG | GGG          | NM_018137.2           | 1                                          | antisense | 0.7238                                       | 107056827                               |
| PRMT6e1.2              | CTCGGACGTTTCGGTCCACG  | AGG          | NM_018137.2           | 1                                          | sense     | 0.6903                                       | 107056885                               |
| PRMT6e1.3              | GCCCATCCACTCGCTCACGA  | TGG          | NM_018137.2           | 1                                          | antisense | 0.6718                                       | 107057173                               |
| PRMT6e1.4              | GTGCCCCTAGAGACAGCGCG  | TGG          | NM_018137.2           | 1                                          | antisense | 0.6809                                       | 107057398                               |
| CARM1e7                | TAGAGCTGTTATCCGTGAA   | GGG          | NM_199141.1           | 7                                          | antisense | 0.6214                                       | 10916451                                |
| CARM1e1                | TCGCGTCGCGAATGGTGAGG  | AGG          | NM_199141.1           | 1                                          | antisense | 0.6159                                       | 10871816                                |
| CARM1e5                | TGGAGCACGGAATACTACG   | CGG          | NM_199141.1           | 5                                          | sense     | 0.8313                                       | 10912257                                |
| CARM1e6                | TTGAAGAGCATGTAGCCCAT  | GGG          | NM_199141.1           | 6                                          | antisense | 0.631                                        | 10913985                                |
| RPA3_e5.1              | GATGAATTGAGCTAGCATGC  | CGG          | NM_002947.3           | 5                                          | antisense | 0.6306                                       | 7640373                                 |
| RPA3_e7                | GGTTGGAAGAGTAACCGCCA  | AGG          | NM_002947.3           | 7                                          | sense     | 0.7045                                       | 7637924                                 |
| RPA3_e6                | TACGGGTTCCATCAACTCGA  | TGG          | NM_002947.3           | 6                                          | antisense | 0.6307                                       | 7639084                                 |
| RPA3_e5.2              | TGGACATGATGACTTGCCC   | AGG          | NM_002947.3           | 5                                          | sense     | 0.6221                                       | 7640398                                 |
| Rosa26 g1 (THUMP3-AS1) | ACCTCTGTGCTTACGCAA    | NGG          | NR_132780.1           | 4                                          | antisense | 0.6255                                       | 9390454                                 |
| Rosa26 g2 (THUMP3-AS1) | GTTGCTTTACTCAACAG     | NGG          | NR_132780.1           | 4                                          | antisense | 0.7707                                       | 9389195                                 |
| Rosa26 g3 (THUMP3-AS1) | GGAATGATCTGAATAGTGT   | NGG          | NR_132780.1           | 4                                          | sense     | 0.5791                                       | 9389474                                 |
| Rosa26 g4 (THUMP3-AS1) | AAGCAGTAGTCAAGATCACC  | NGG          | NR_132780.1           | 2                                          | antisense | 0.5735                                       | 9395543                                 |

**a**

| Cell Line | <i>VHL</i>                                                       | <i>PBRM1</i>                                          | <i>SETD2</i>                            | <i>BAP1</i>       |
|-----------|------------------------------------------------------------------|-------------------------------------------------------|-----------------------------------------|-------------------|
| 22        | Nonsense: p.Y175*                                                | Nonsense: p.E1416*                                    | In frame deletion: p.Q1292 Y1293delinsH |                   |
| 162       | Nonsense <sup>#</sup> : p.R161*                                  | Missense: p.D727Y                                     |                                         |                   |
| 222       | Frame shift deletion: p.T157fs                                   | Frame shift deletion: p.E1201fs<br>Missense: p.P1188L |                                         |                   |
| 243       | Nonsense: p.R113*                                                |                                                       |                                         | Missense: p.H141Y |
| 323       | Frame shift insertion: p.N174fs                                  |                                                       |                                         |                   |
| 364       | Nonsense: p.Y185*                                                |                                                       |                                         |                   |
| 407       | Frame shift deletion: p.E188fs<br>Frame shift deletion: p.R200fs | Nonsense: p.R512*                                     |                                         |                   |
| 786-0     | Frame shift deletion: p.G104Afs                                  |                                                       |                                         |                   |

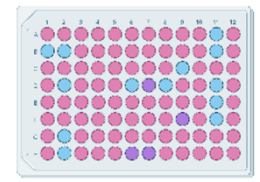

36 epigenetic chemical probes  
3 Biological Replicates

LI-COR quantification of DRAQ5 DNA staining

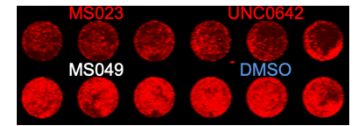

Identification of ccRCC proliferation inhibitors

**b**

Epiprobe Set 1: All ccRCC Cell Lines

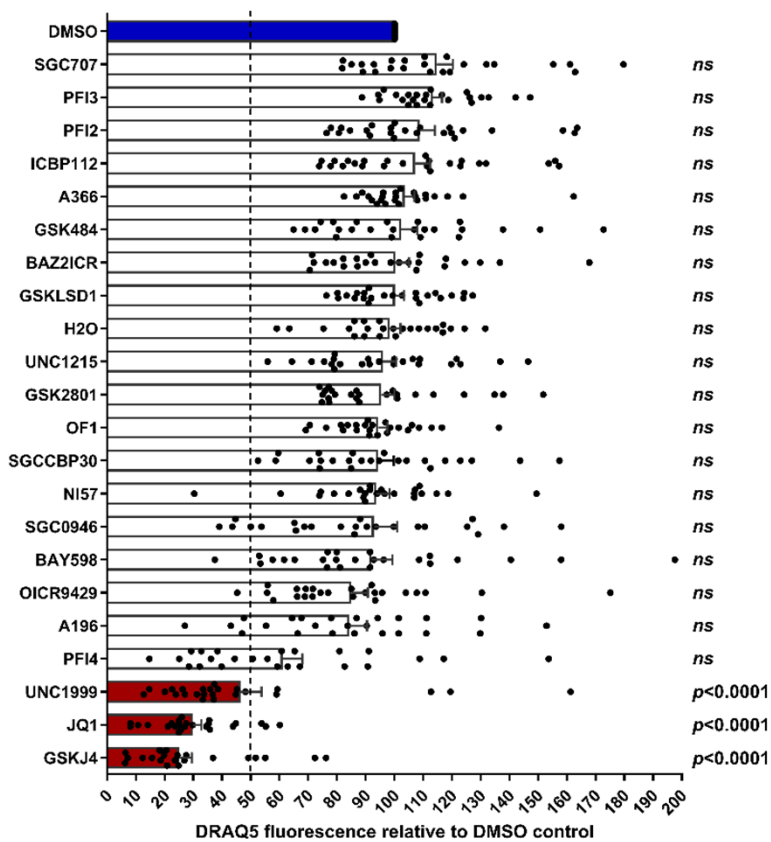

Epiprobe Set 2: All ccRCC Cell Lines

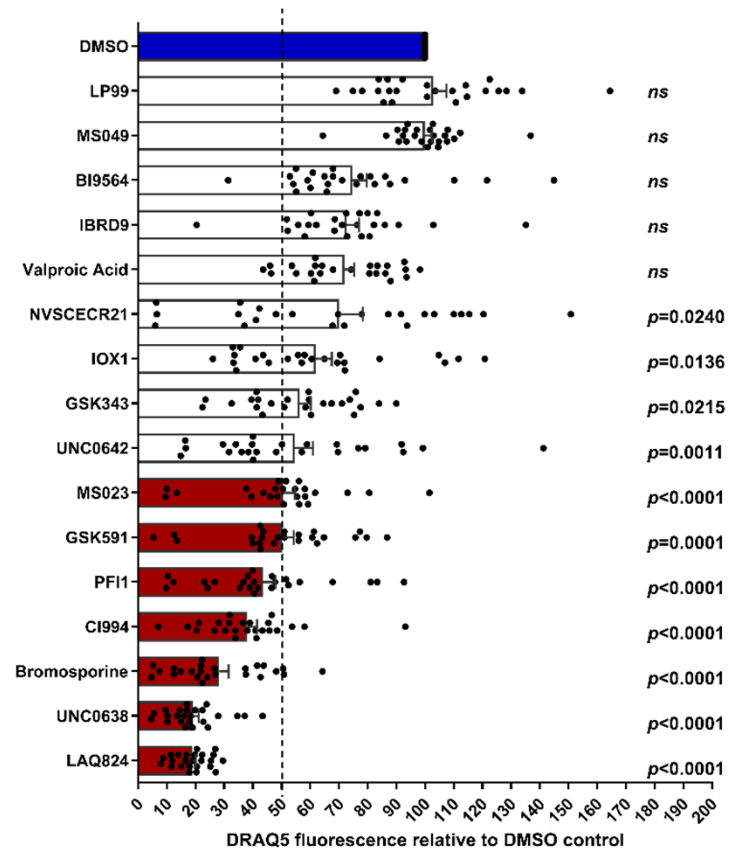

### Supplementary Figure 1. Epiprobe Screen

**a**, Mutation profiles for select genes in eight ccRCC cell lines and the schematic workflow of epigenetic chemical probe screen. **b**, Epiprobe chemical screen results across all cell lines. Data are presented as the mean fluorescence normalized to DMSO of 8 biological replicates with 3 technical replicates each  $\pm$  SD and  $p$  values are calculated by 1-way ANOVA with Dunnett's multiple comparison relative to DMSO control group. Red bars indicate  $p$ -values  $< 0.05$  and a mean fluorescence intensity value  $< 50\%$  compared to DMSO control (dotted line). Data corresponds to heat map shown in Figure 1. ns=nonsignificant. Source data are provided as a Source Data file. Panel (a)'96-well plate schematic created with BioRender.com released under a Creative Commons Attribution-NonCommercial-NoDerivs 4.0 International license.



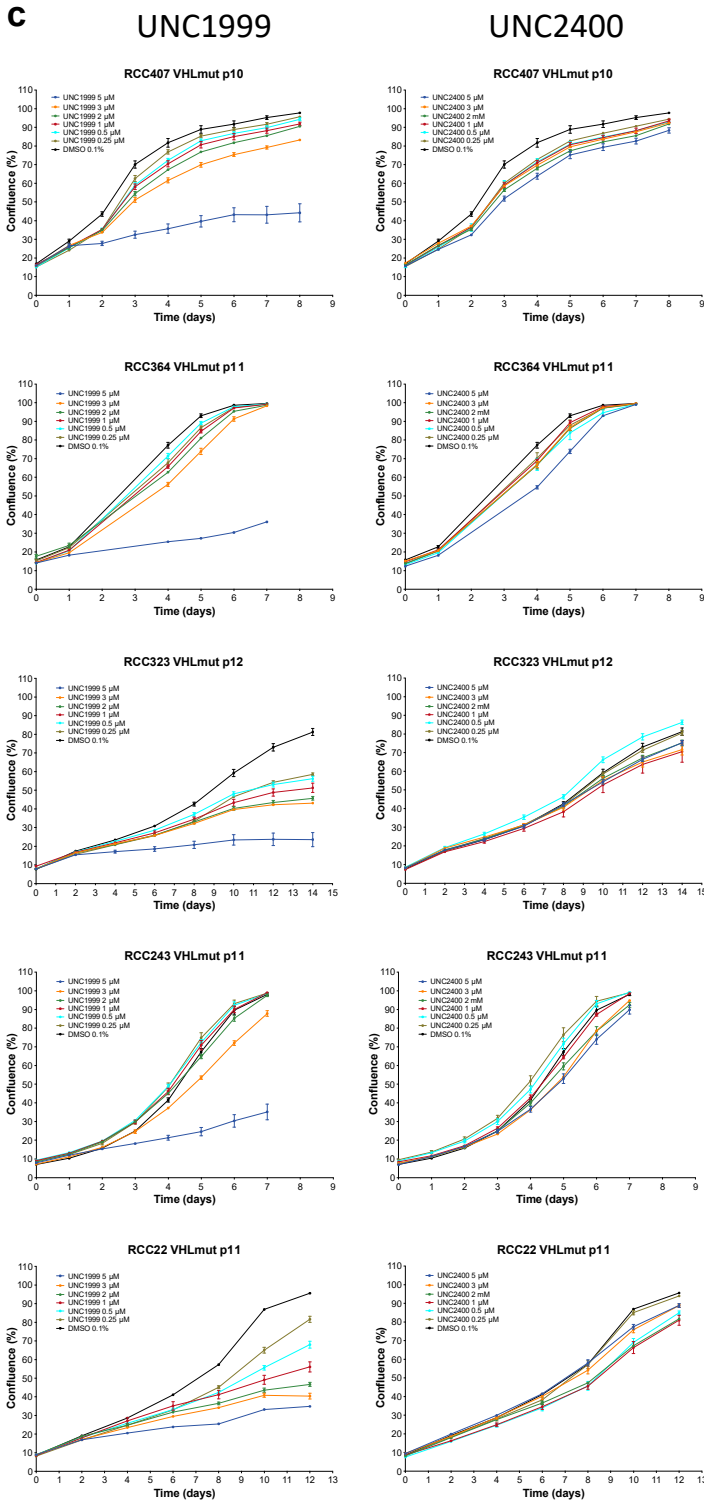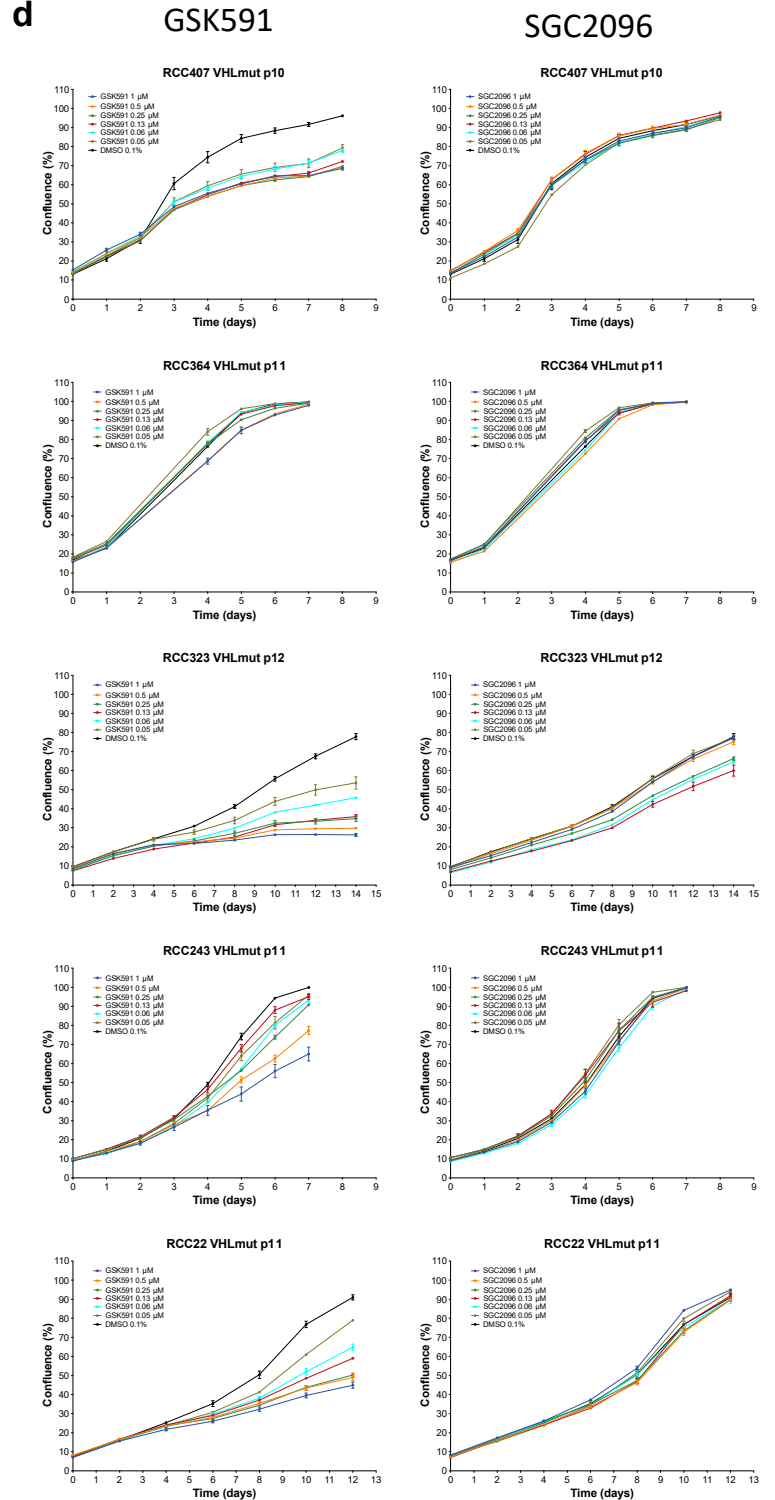

**e****MS023**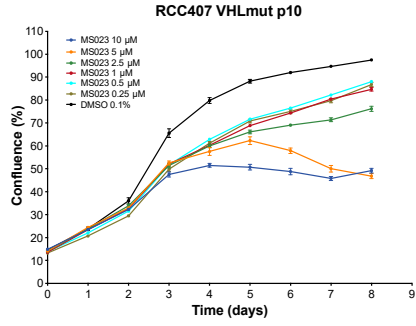**MS094**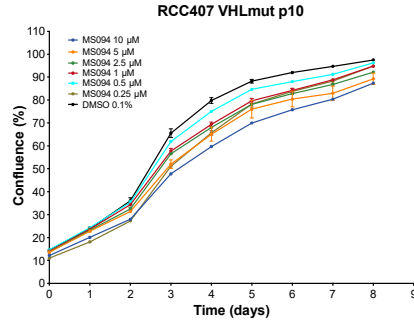**f****PFI-1**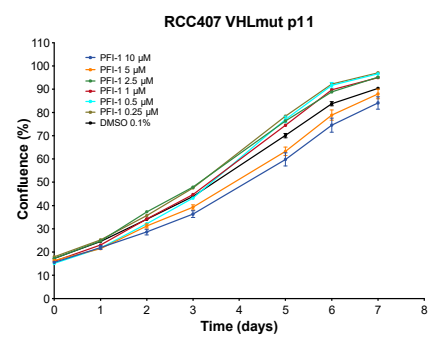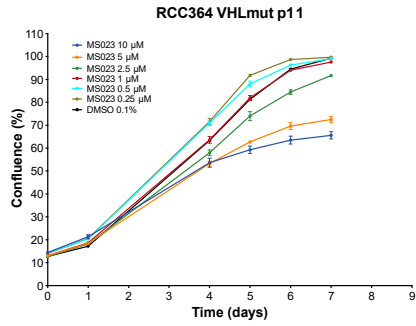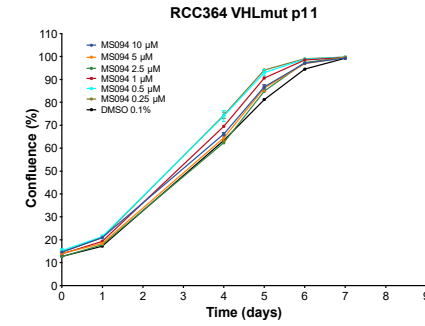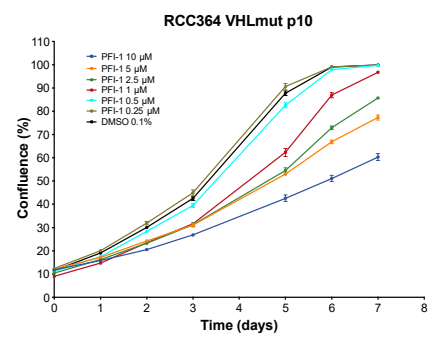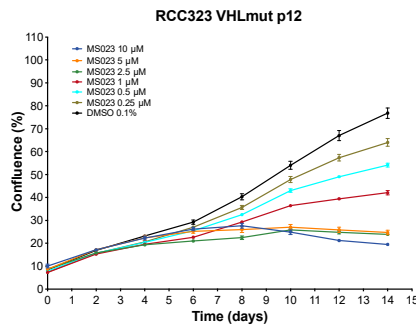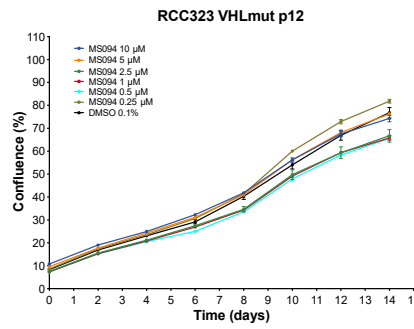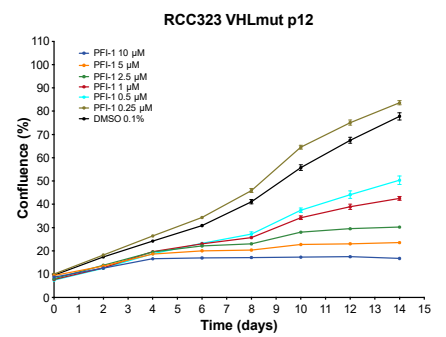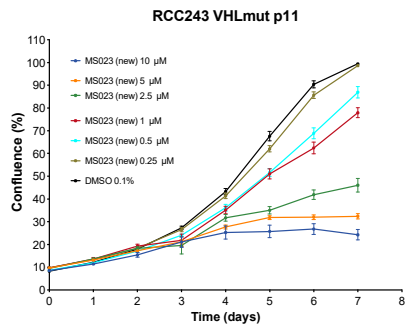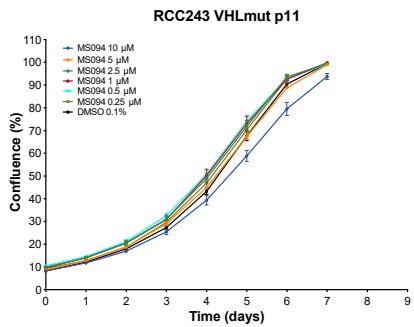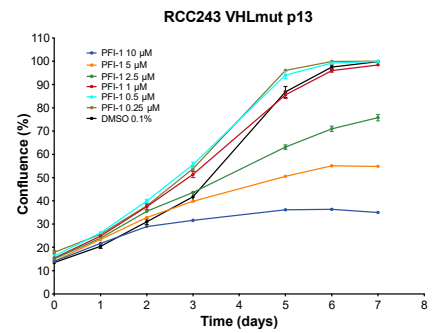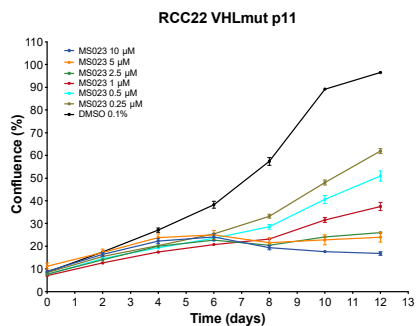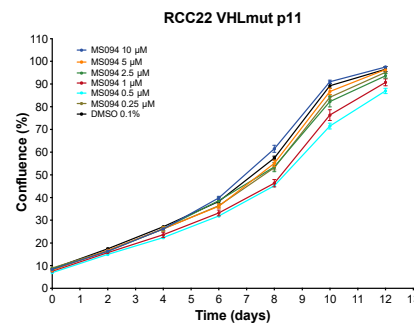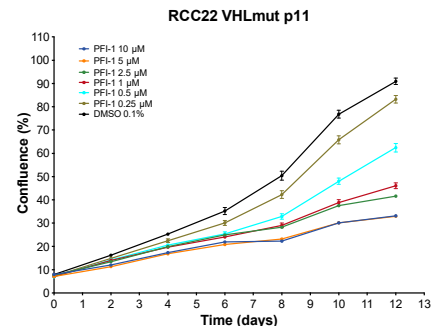

g

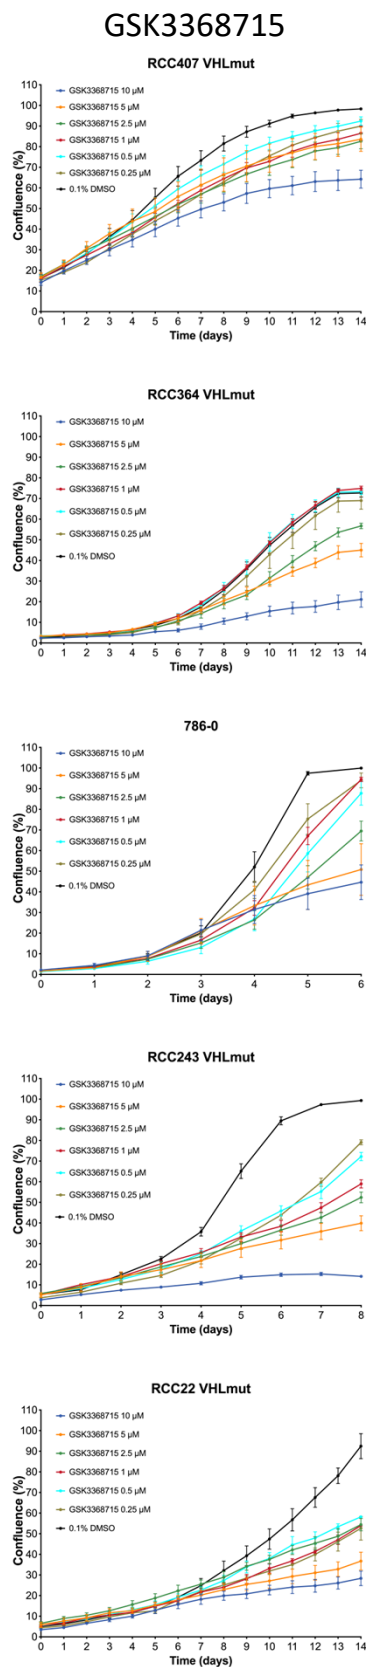

h

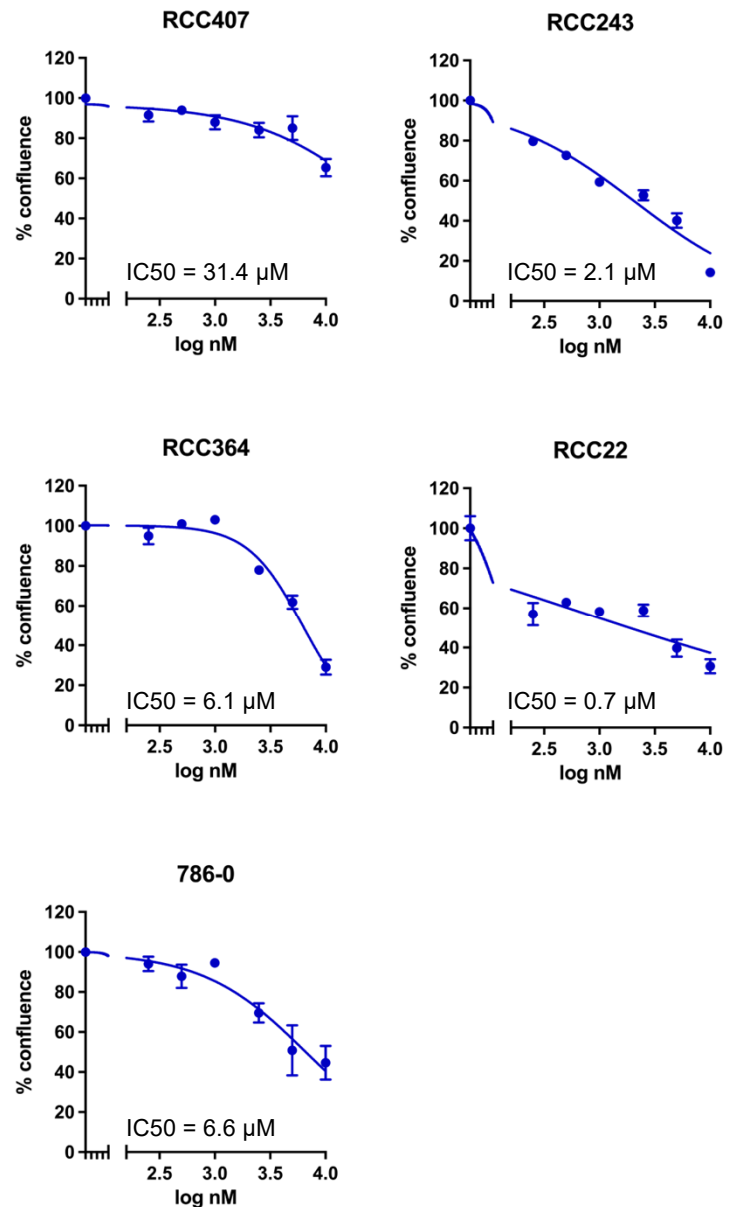

### Supplementary Figure 2. Dose Response Curves for Epiprobe Hits

Dose response curves across cell lines RCC407, RCC364, RCC323, RCC243 and RCC22, for **a**, GSKJ4 vs inactive control GSKJ5. **b**, (+)JQ1 vs inactive control (-)JQ1. **c**, UNC1999 vs inactive control UNC2400. **d**, GSK591 vs inactive control SGC2096. **e**, MS023 vs inactive control MS094. **f**, PFI-1. **g**, GSK3368715, a pan-type I PRMT inhibitor (786-0 evaluated in place of RCC323). Data in **a-g** presented as the mean  $\pm$  SD calculated from 3 technical replicates for each cell line **h**, GSK3368715 IC<sub>50</sub> values across indicated ccRCC models. Data are presented as the mean  $\pm$  SD calculated from 4 technical replicates for each cell line. Data presented at Day 6 for 786-0, Day 8 for RCC243 and Day 14 for RCC22, RCC364 and RCC407 (determined based on the time at which control-treated cells reached confluence). Source data are provided as a Source Data file.

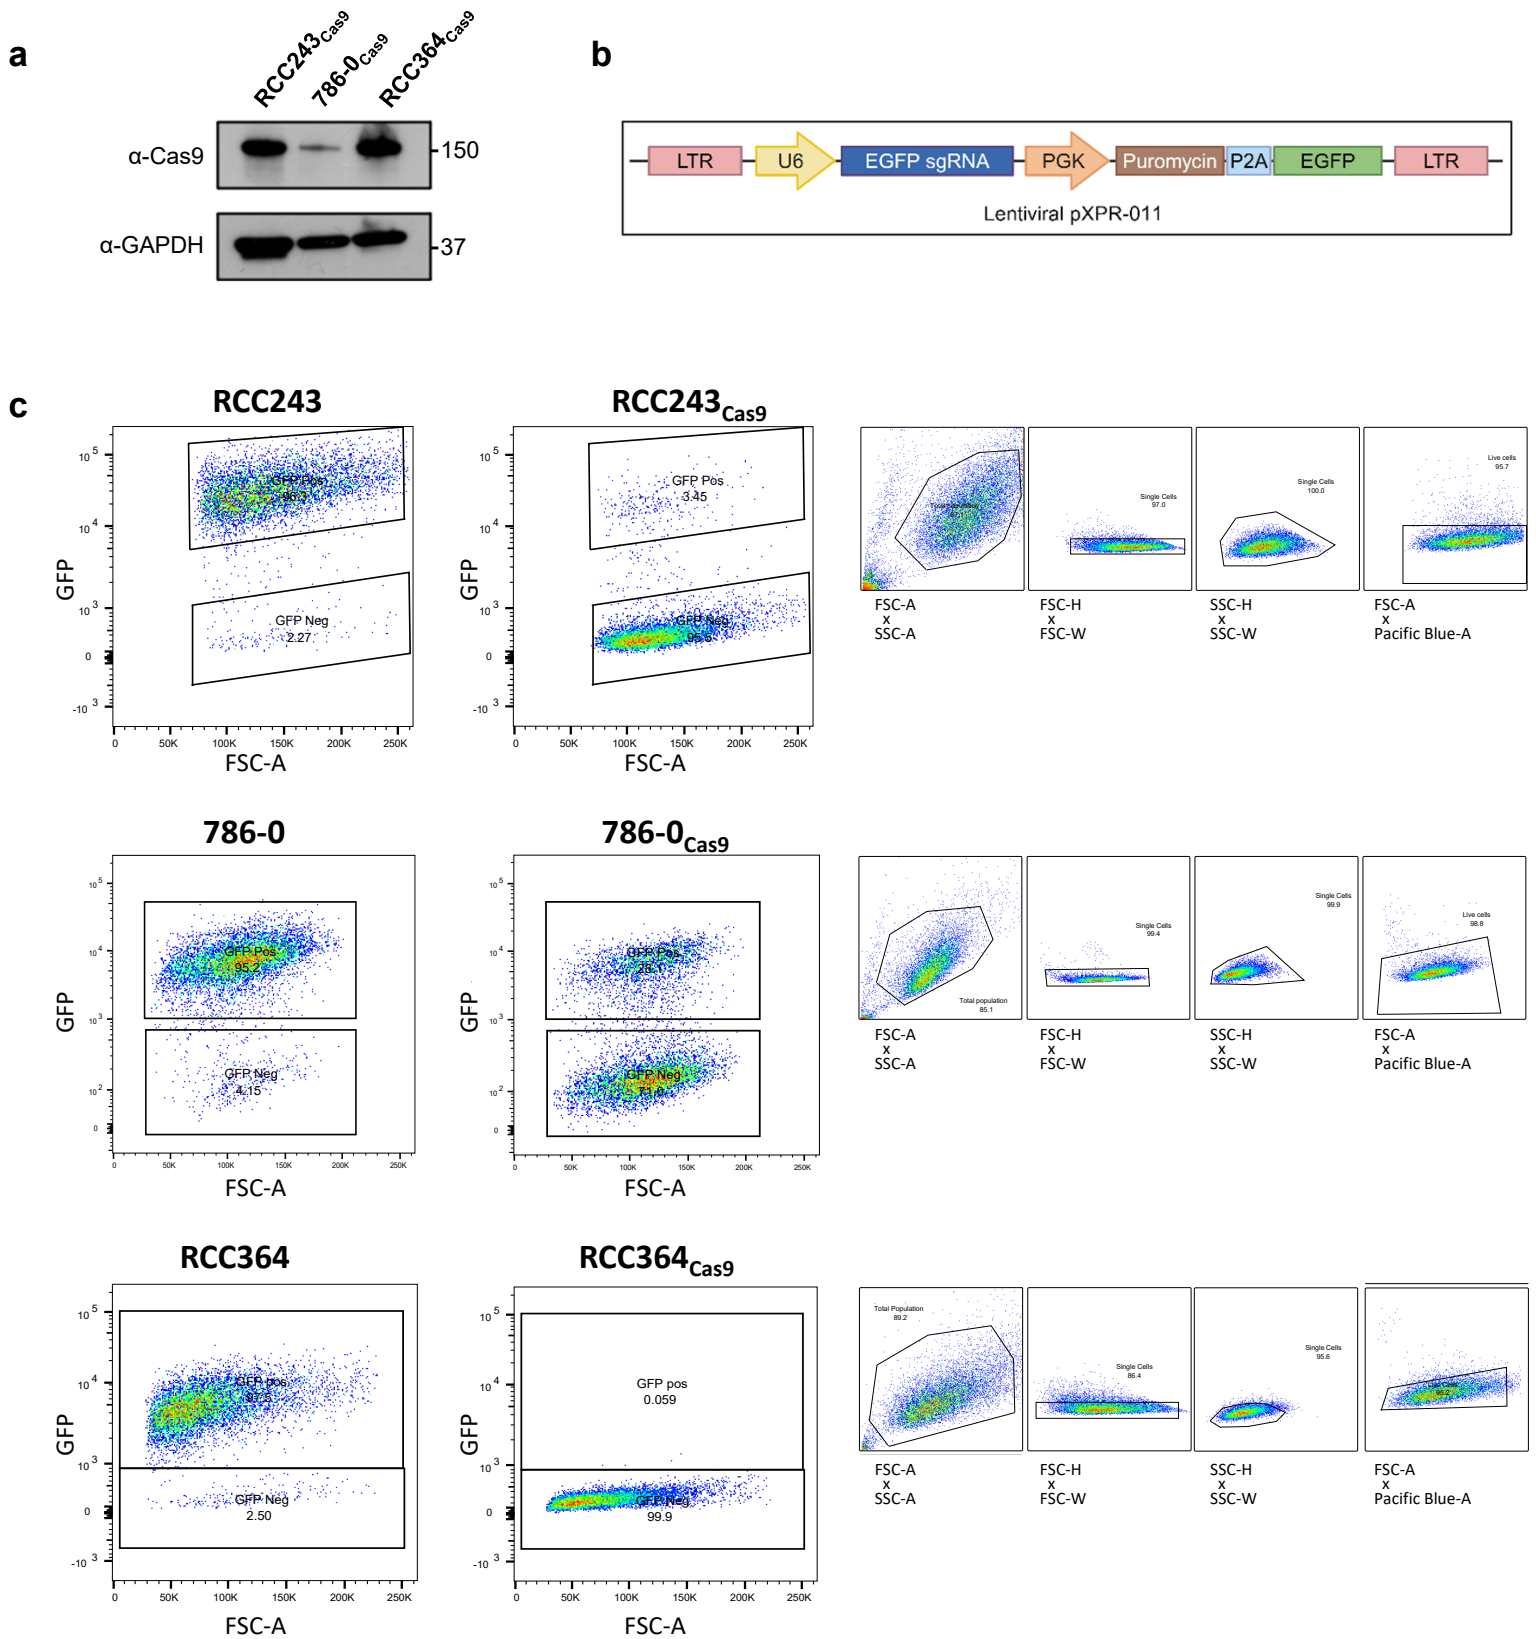

### Supplementary Figure 3. Validation of Functional Gene Editing in ccRCC Cell Lines

**a**, Western blot analysis of Cas9 expression in RCC243Cas9, 786-0Cas9 and RCC364Cas9 following transduction with lentivirally delivered humanized Cas9 gene and serial dilutions to establish monoclonal lines. Experiment performed once. **b**, Functional testing lentiviral genetic construct that expresses both the green fluorescence protein (GFP) and the guide (g-)RNA targeting GFP. **c**, Analytical flow cytometry analysis of GFP expression in parental and Cas9-expressing lines 5 days after genetic cassette in (b) introduced *via* lentiviral transduction. The gating strategy to select for viable, non-doublet cells is shown to the right. Source data are provided as a Source Data file. Panel (b) created with BioRender.com released under a Creative Commons Attribution-NonCommercial-NoDerivs 4.0 International license.



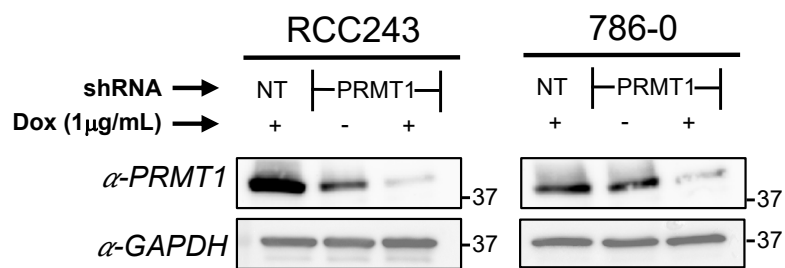

**Supplementary Figure 4. Western blot analysis of PRMT1 expression in RCC 243 and 786-0 cells**  
 Cell lines were engineered to express doxycycline (Dox)-inducible PRMT1 targeting or non-targeting (NT) shRNAs and treated with or without 1.0 µg/mL Dox for 4 days prior to RNA-seq analysis. Source data are provided as a Source Data file.

# MS023 vs DMSO

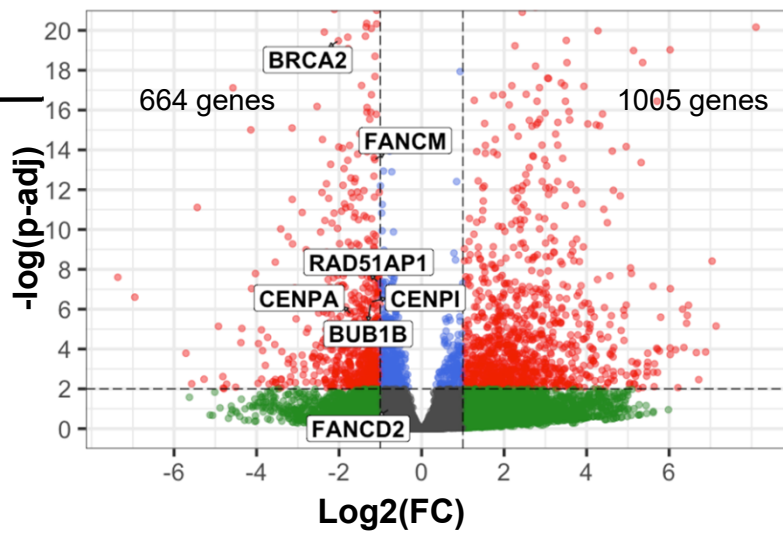

## 664 Down Regulated Genes (FDR ≤ 0.01, log<sub>2</sub>(FC) ≤ 1):

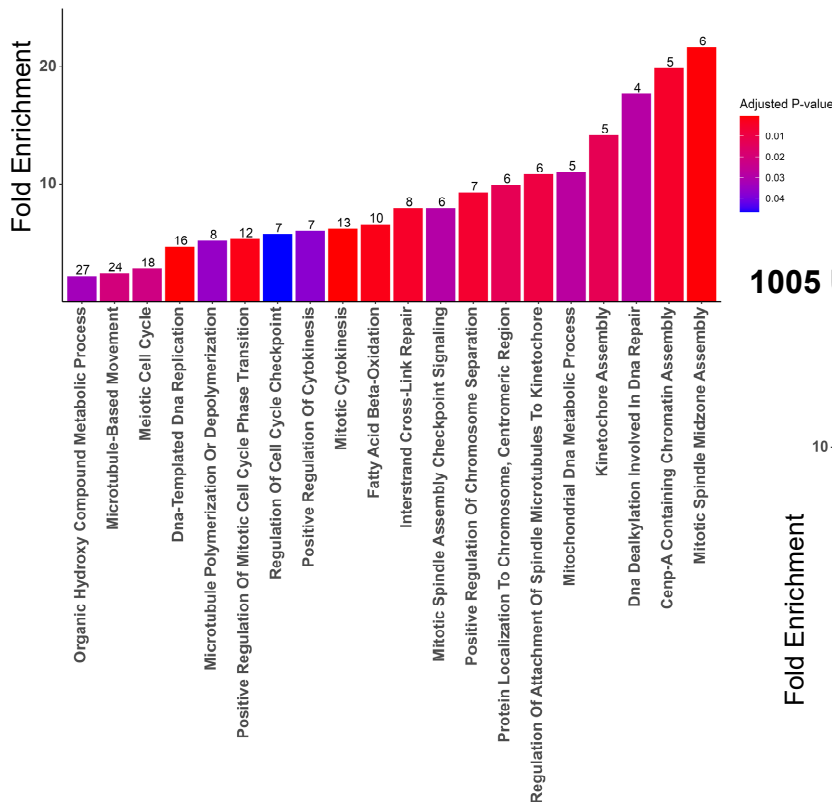

## 1005 Up Regulated Genes (FDR ≤ 0.01, log<sub>2</sub>(FC) ≥ 1):

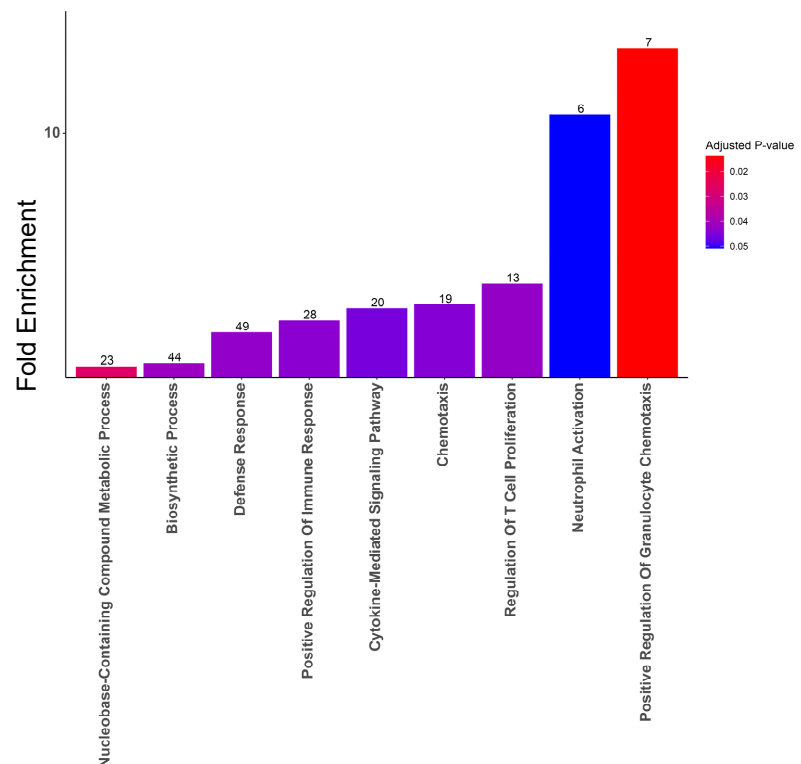

### Supplementary Figure 5. Differentially expressed genes in MS023 vs DMSO-treated cells.

Volcano plot of log<sub>2</sub>fold-change for genes significantly downregulated (red, left) or upregulated (red, right) genes following 3 days of 5 μM MS023 treatment in cell lines 786-0 and RCC243. Specific mitotic and DNA damage genes of interest explicitly labelled in plot. Overrepresentation analysis for gene ontology (GO) biological processes on indicated downregulated (505/664 mapped) and upregulated (376/1005 mapped) gene lists. Number of genes in down regulated list per GO biological process listed above each respective bar. Go terms filtered to most specific subclass.

DOX vs No DOX

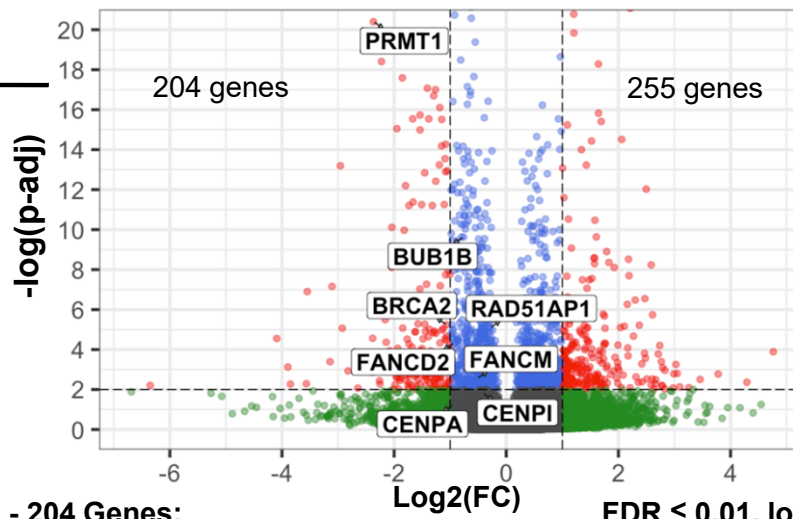

**FDR ≤ 0.01, log<sub>2</sub>(FC) ≤ -1 - 204 Genes:**  
-No Pathways Detected

**FDR ≤ 0.01, log<sub>2</sub>(FC) ≥ 1 - 255 Genes:**  
-No Pathways Detected

**FDR ≤ 0.01, log<sub>2</sub>(FC) < 0 - 794 Genes:**  
696 Mapped  
98 Unmapped

**FDR ≤ 0.01, log<sub>2</sub>(FC) > 0 - 704 Genes:**  
-No Pathways Detected

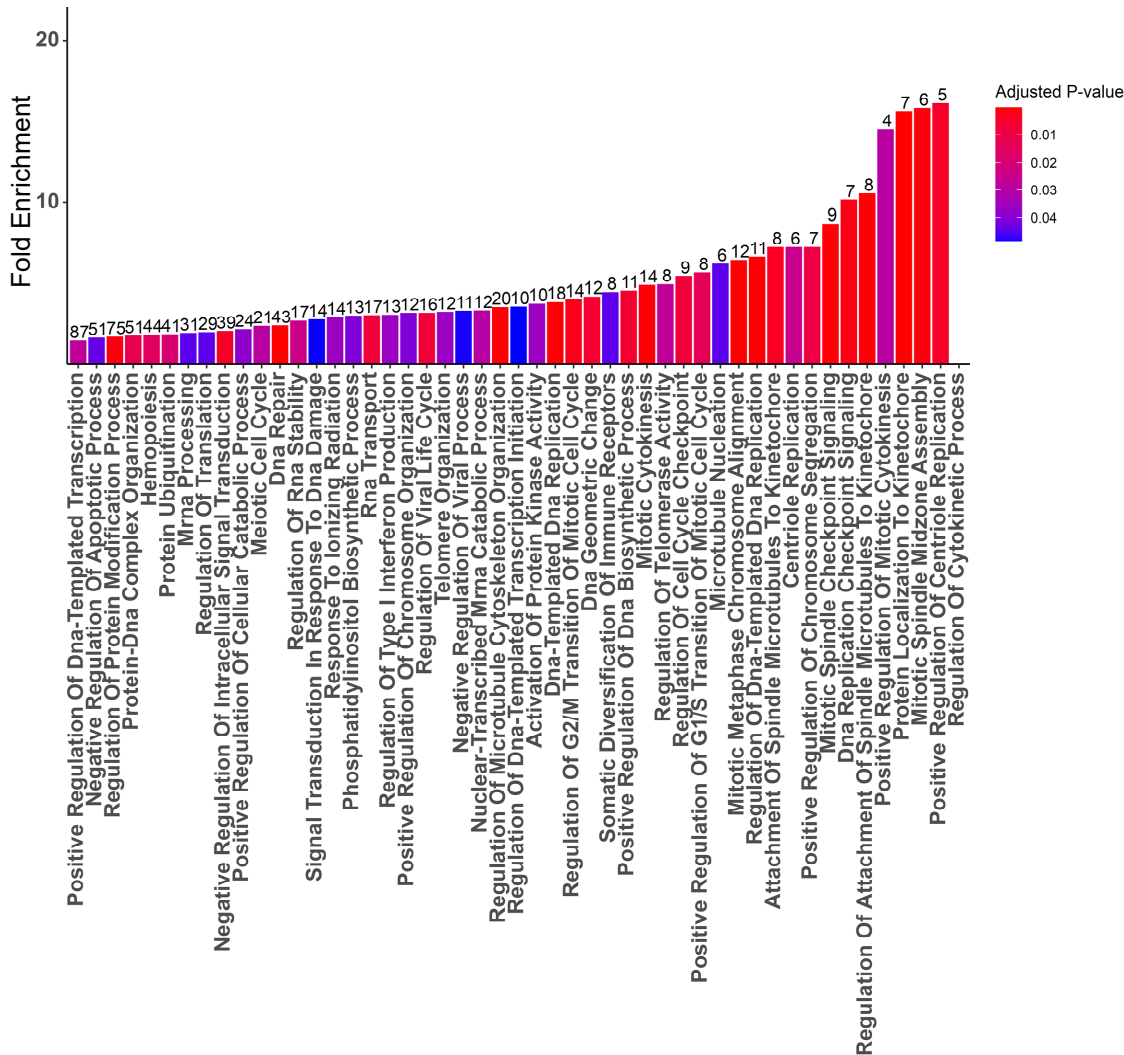

**Supplementary Figure 6. Differentially expressed genes in PRMT1 knockdown vs control cells.**

Volcano plot of log<sub>2</sub>fold-change for genes significantly downregulated (red, left) or upregulated (red, right) genes in cell lines 786-0 and RCC243 expressing PRMT1 targeting shRNAs treated with or without 1.0 µg/mL Dox for 4 days. Specific mitotic and DNA damage genes of interest explicitly labelled in plot. Overrepresentation analysis for gene ontology (GO) biological processes on indicated downregulated and upregulated gene lists. Number of genes in down regulated list per GO biological process listed above each respective bar. GO terms filtered to most specific subclass.

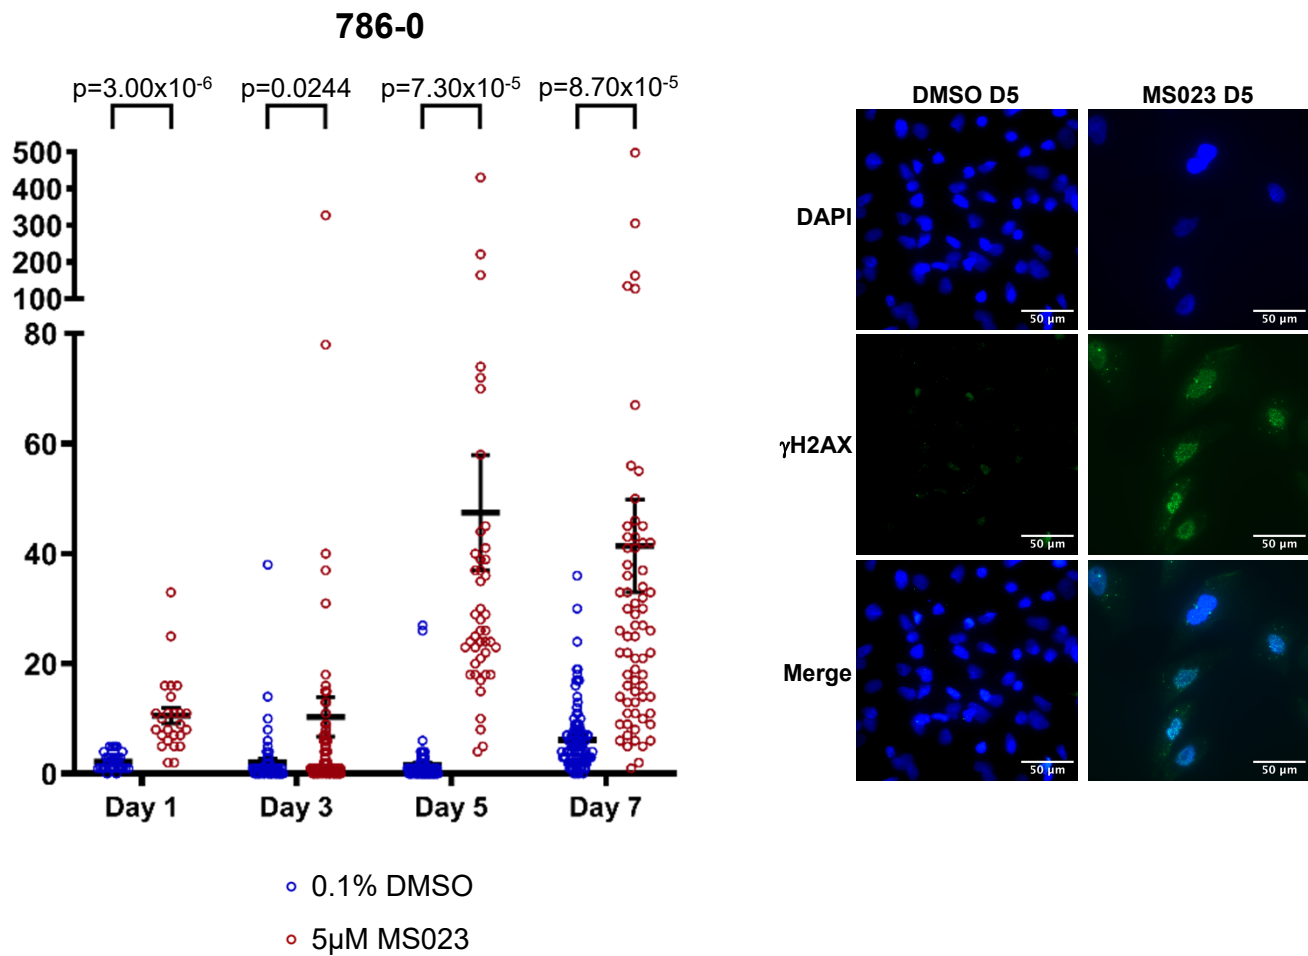

### Supplementary Figure 7. Analysis of $\gamma$ H2AX foci in 786-0 cells

Scatter plots of  $\gamma$ H2AX foci in 786-0 cells treated with and without 5  $\mu$ M MS023 for indicated times. P-values are calculated by unpaired t-test with Welch's correction. Representative images from Day 5 of treatment are shown to the right.  $n = 33$  vs 25 cells (Day 1 DMSO vs MS023),  $n = 69$  vs 99 cells (Day 3 DMSO vs MS023),  $n = 122$  vs 45 cells (Day 5 DMSO vs MS023) and  $n = 110$  vs 70 cells (Day 7 DMSO vs MS023). Source data are provided as a Source Data file.

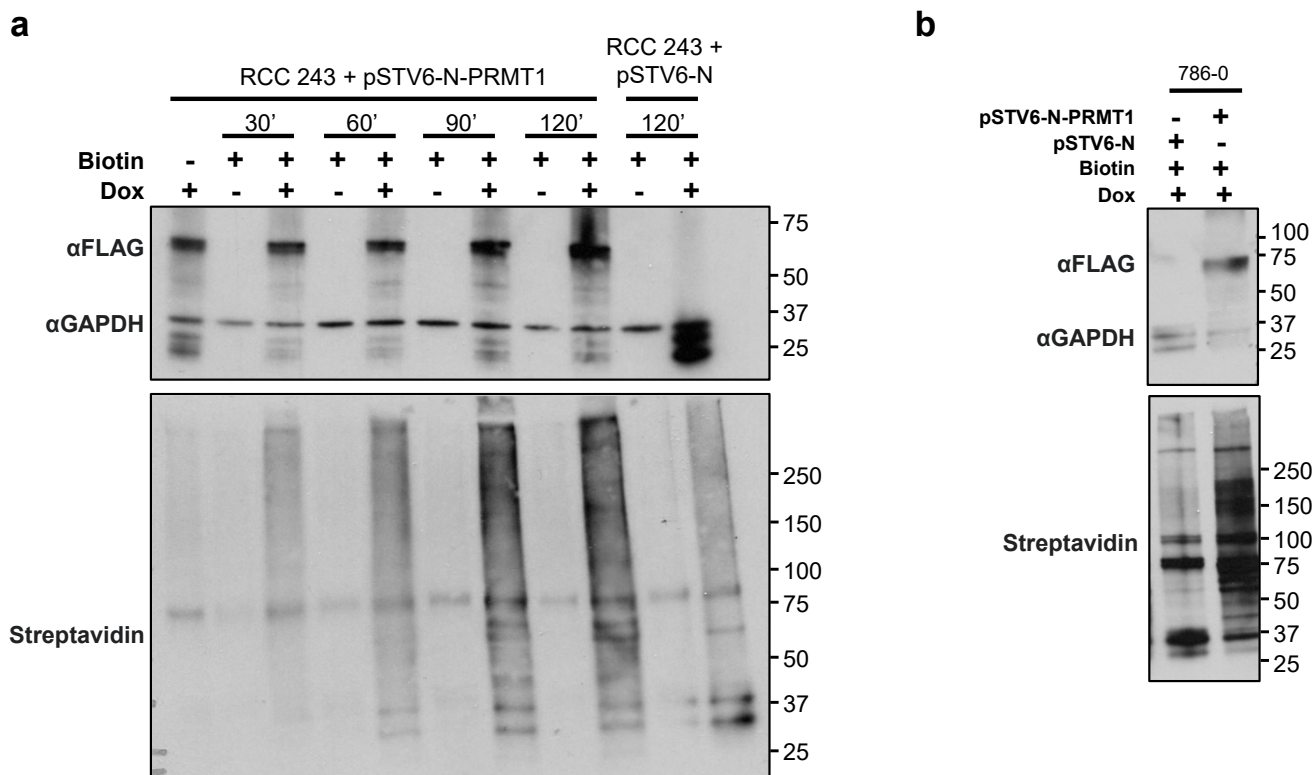

**Supplementary Figure 8. Western blots for induction of PRMT1v1 expression and global biotinylation levels in cells used for Bio-ID**

**a**, RCC243 cells were transduced with PRMT1-miniTurbo fusion (pSTV6-Nterm-PRMT1) or miniTurbo alone (pSTV6-N) and 1  $\mu\text{g}/\text{mL}$  doxycycline was added for 24 hours to induce protein expression. 50  $\mu\text{M}$  biotin was then added for the indicated times. Western blot analysis of protein expression *via* FLAG-tag detection and biotinylation levels *via* streptavidin detection are shown. 90 minutes was chosen as the appropriate time point for analysis. **b**, 786-0 cells were transduced with PRMT1-miniTurbo fusion (pSTV6-Nterm-PRMT1) or miniTurbo alone (pSTV6-N) and 1  $\mu\text{g}/\text{mL}$  doxycycline was added for 24 hours to induce protein expression. 50  $\mu\text{M}$  biotin was added for 90 min. Western blot analysis of protein expression *via* FLAG-tag detection and biotinylation levels *via* streptavidin detection are shown. Source data are provided as a Source Data file.

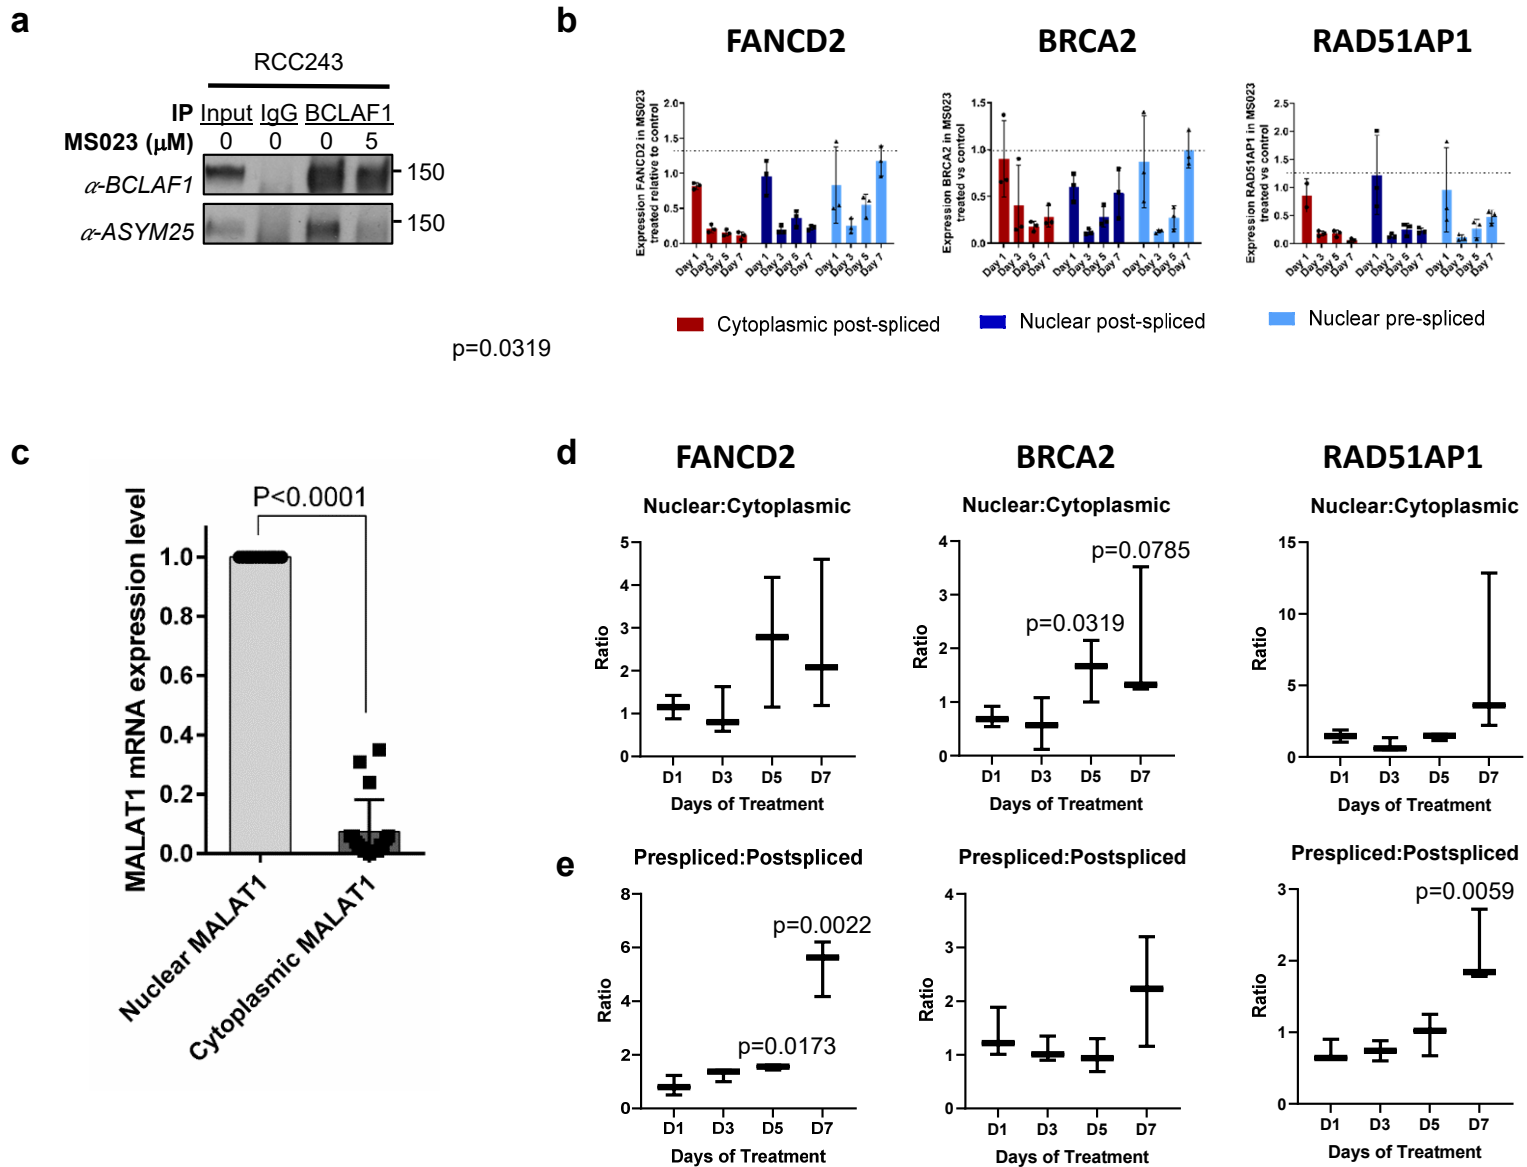

**Supplementary Figure 9. Validation of BCLAF1 as a PRMT1 substrate and effect of MS023 on expression and nucleocytoplasmic transport of selected DDR genes**

**a**, RCC243 cells were incubated with 5  $\mu\text{M}$  of MS023 or 0.1% DMSO for 3 days, lysed and anti-BCLAF1 immunoprecipitations were performed. The bound proteins were separated by SDS-PAGE and immunoblotted with the indicated antibodies. **b**, mRNA levels for indicated genes in denoted cellular fraction after exposure to 1, 3, 5 and 7 days treatment with 5  $\mu\text{M}$  MS023. Data presented as the mean of  $n = 3$  biological replicates per gene per day (3 technical replicates per biological replicate used to calculate  $\Delta\Delta\text{Ct}$  values). **c**, MALAT1 lncRNA levels in the nuclear vs cytoplasmic fractions for samples in (b) as assessed by qRT-PCR. MALAT1 is largely absent from cytoplasmic fractions relative to nuclear compartments. Data presented as mean of  $n=18$  biological replicates per gene (3 technical replicates per biological replicate used to calculate  $\Delta\Delta\text{Ct}$  values) **d**, **e**, Ratio of nuclear/cytoplasmic post-spliced transcripts and ratio of nuclear pre-spliced to nuclear post-spliced transcripts. mRNA expression levels assessed *via* qRT-PCR on cDNA generated from DNase treated RNA samples and normalized to Actin. Graphs represent the mean of three independent experiments  $\pm$ SD. Significant differences in the ratios were assessed using Student's two-tailed t-test in comparison to DMSO-treated cells. Only significant or near significant p-values are shown. Source data are provided as a Source Data file.

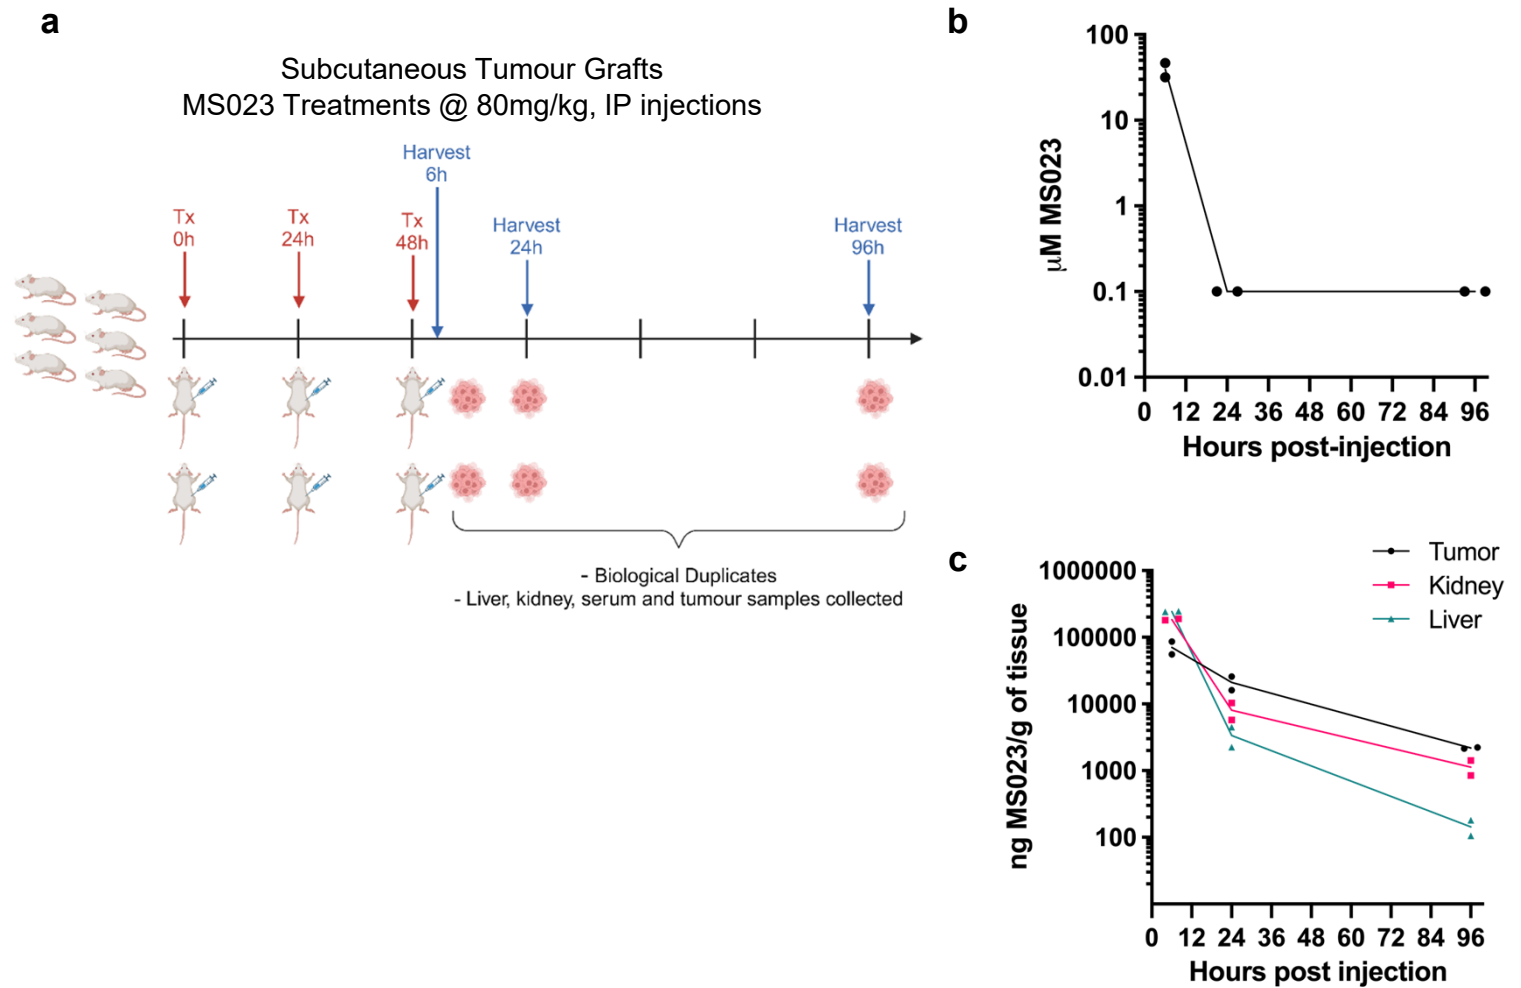

**Supplemental Figure 10. Pharmacokinetics of MS023 in tumor-bearing NSG mice**

**a**, Dosing and tissue collection schedule for PK study. **b**, Mass spectrometry serum measurements of MS023 post Day 3 injection.  $n = 2$  mice/time point. **c**, Mass spectrometry tissue measurements of MS023 in tumor tissue, kidney and liver post Day 3.  $n = 2$  mice/time point. Source data are provided as a Source Data file. Panel (a) created with BioRender.com released under a Creative Commons Attribution-NonCommercial-NoDerivs 4.0 International license
