# Supplementary material for: PRMT1 inhibition perturbs RNA metabolism and induces DNA damage in clear cell renal cell carcinoma
Source: PubMed Central journal article supplement — Nat Commun. 2024 Sep 19;15:8232. doi: 10.1038/s41467-024-52507-y (PMC11413393; doi:10.1038/s41467-024-52507-y), 2024-09-19
Supplement: 41467_2024_52507_MOESM3_ESM.pdf [file 41467_2024_52507_MOESM3_ESM.pdf]

## **Description of Additional Supplementary Files**

File Name: Supplementary Data 1a

Description: Significantly differentially expressed genes in MS023 vs DMSO treated RCC243 and 786-0 cells.

File Name: Supplementary Data 1b

Description: Significantly differentially expressed genes in inducible PRMT1 knockdown cells treated with doxycycline vs no doxycycline.
